# Supplementary material for: Chemical vapor deposition of tantalum carbide and carbonitride thin films from Me3CETa(CH2CMe3)3 (E = CH, N)Electronic supplementary information (ESI) available: AFM and SEM images of TaC and TaCN films deposited on Si(100) at 773, 823 and 923 K. See http://www.rsc.org/suppdata/jm/b2/b208129f/
Source: Royal Society of Chemistry journal article supplement (doi:10.1039/b208129f), 2002-11-28
Supplement: b208129f.doc [file b208129f.doc]

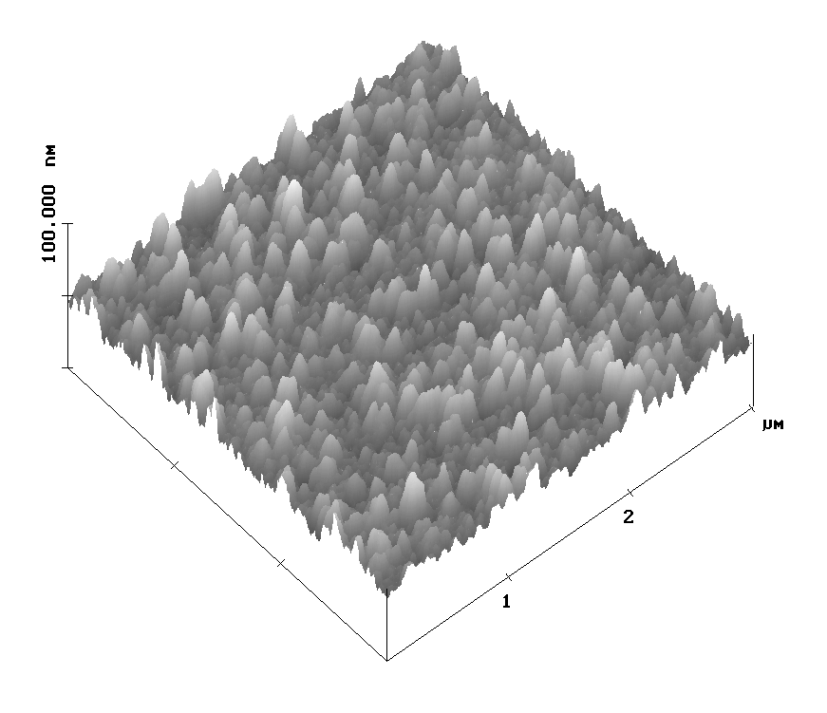


Figure 1. AFM surface morphology of the film on Si(100) deposited at 773 K from Me3CCH=Ta(CH2CMe3)3 in H2. Rrms = 5.1 nm


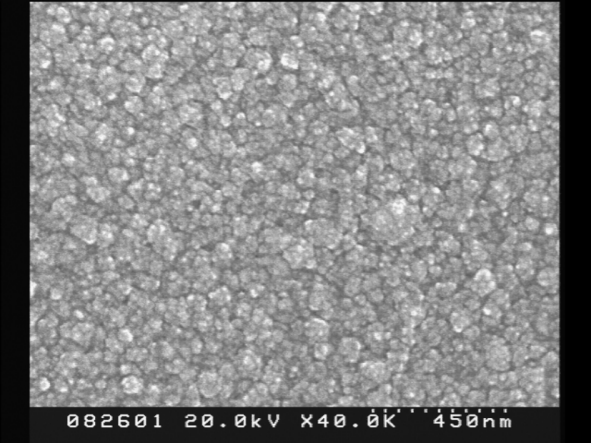


Figure 2. SEM micrograph of the film on Si(100) deposited at 773 K from Me3CCH=Ta(CH2CMe3)3 in H2.


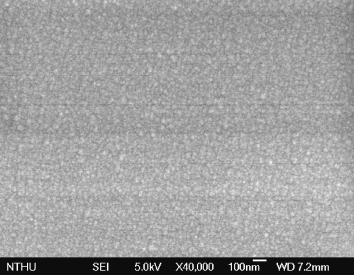


Figure 3. SEM micrograph of the film on Si(100) deposited at 773 K from Me3CN=Ta(CH2CMe3)3 in H2.


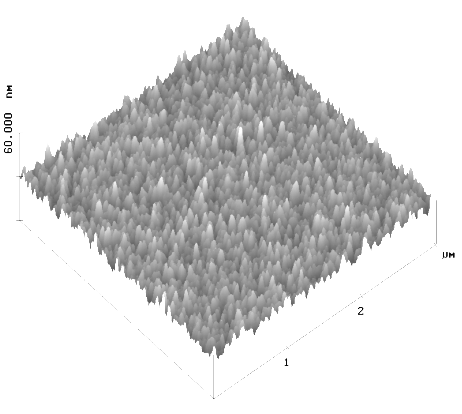


Figure 4. AFM surface morphology of the film on Si(100) deposited at 823 K from Me3CCH=Ta(CH2CMe3)3 in Ar. Rrms = 3.0 nm


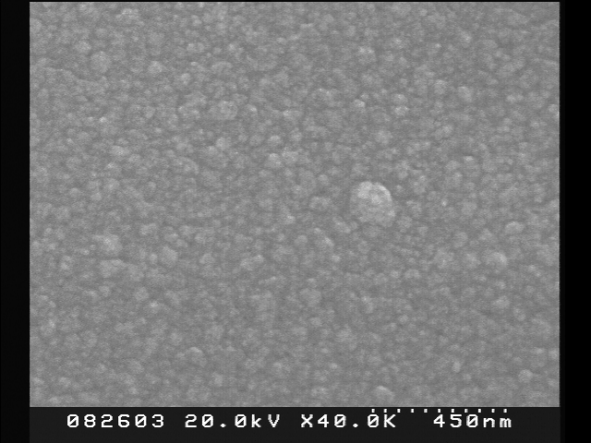


Figure 5. SEM micrograph of the film on Si(100) deposited at 823 K from Me3CCH=Ta(CH2CMe3)3 in Ar.


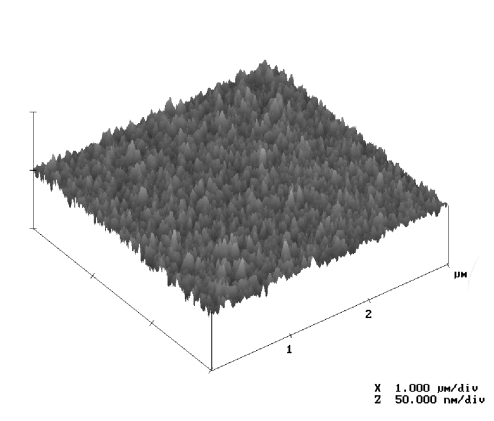


Figure 6. AFM surface morphology of the film on Si(100) deposited at 923 K from Me3CN=Ta(CH2CMe3)3 in Ar. Rrms = 3.0 nm


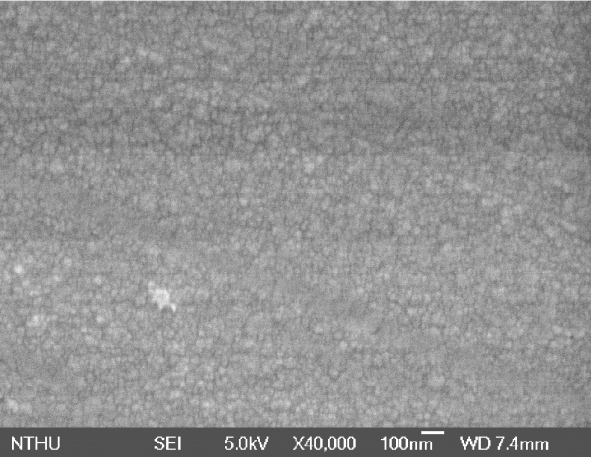


Figure 7. SEM micrograph of the film on Si(100) deposited at 923 K from Me3CN=Ta(CH2CMe3)3 in Ar.
